# Supplementary material for: The contribution of washing processes of synthetic clothes to microplastic pollution
Source: PubMed Central journal article supplement (PMC6488573; doi:10.1038/s41598-019-43023-x), 2019-04-29
Supplement: 41598_2019_43023_MOESM1_ESM.pdf [file 41598_2019_43023_MOESM1_ESM.pdf]

## **The contribution of washing processes of synthetic clothes to microplastic pollution**

Francesca De Falco<sup>1</sup>, Emilia Di Pace<sup>1</sup>, Mariacristina Cocca<sup>1\*</sup>, Maurizio Avella<sup>1</sup>

1 Institute for Polymers, Composites and Biomaterials, National Research Council of Italy, Via  
Campi Flegrei, 34 - 80078 Pozzuoli (NA), Italy

### **Corresponding Author:**

\* Mariacristina Cocca

Institute for Polymers, Composites and Biomaterials, National Research Council of Italy, Via  
Campi Flegrei, 34 - 80078 Pozzuoli (NA), Italy

tel. +390818675363

e-mail address [mariacristina.cocca@ipcb.cnr.it](mailto:mariacristina.cocca@ipcb.cnr.it)

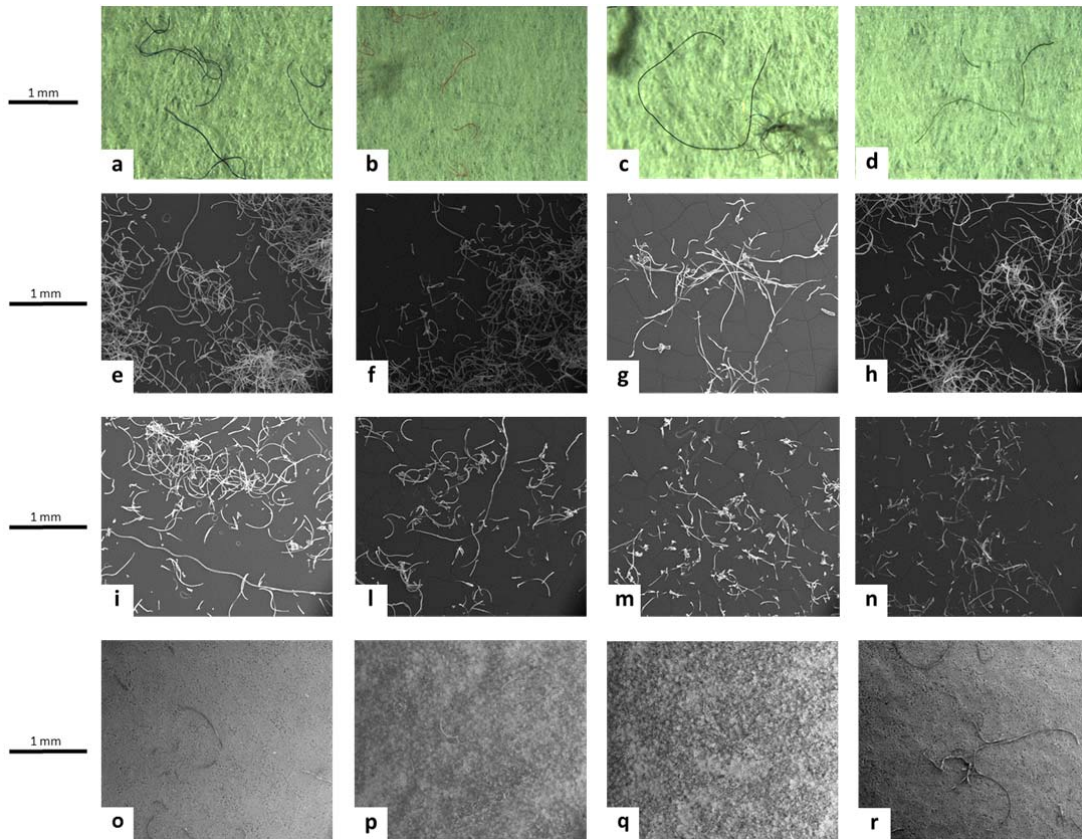

**Figure S1.** Optical micrographs of microfibers sampled by 400  $\mu\text{m}$  pore size mesh released by a) BT, b) RT, c) GB, d) GT; SEM micrographs of microfibers sampled by 60  $\mu\text{m}$  pore size filters released by e) BT, f) RT, g) GB, h) GT; SEM micrographs of microfibers sampled by 20  $\mu\text{m}$  pore size filters released by i) BT, l) RT, m) GB, n) GT; SEM micrographs of microfibers sampled by 60  $\mu\text{m}$  pore size filters released by o) BT, p) RT, q) GB, r) GT.

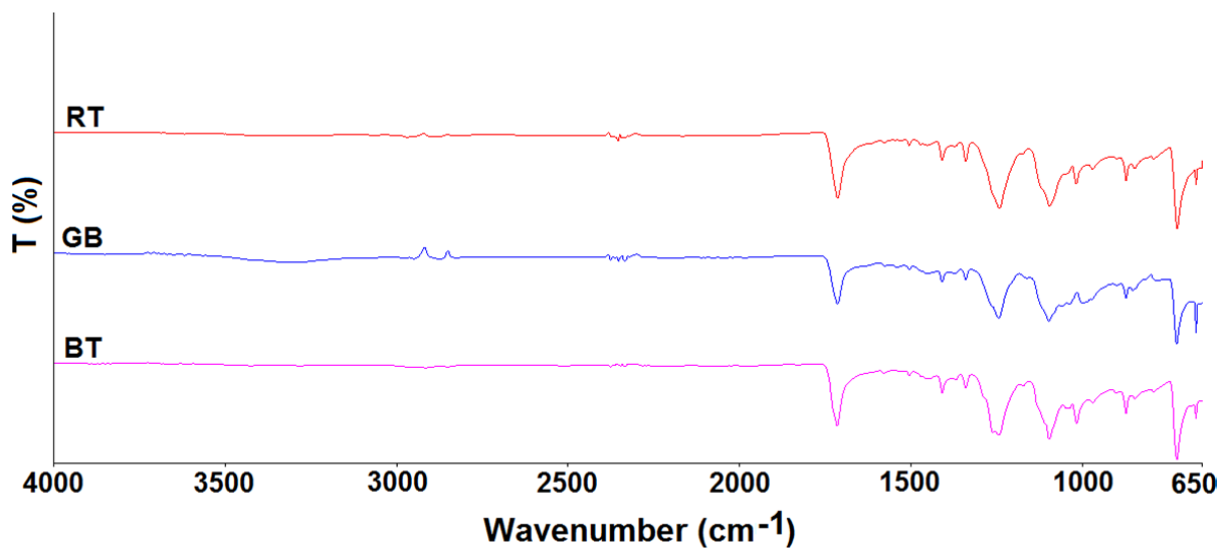

Figure S2. FTIR spectra of RT, GB and BT

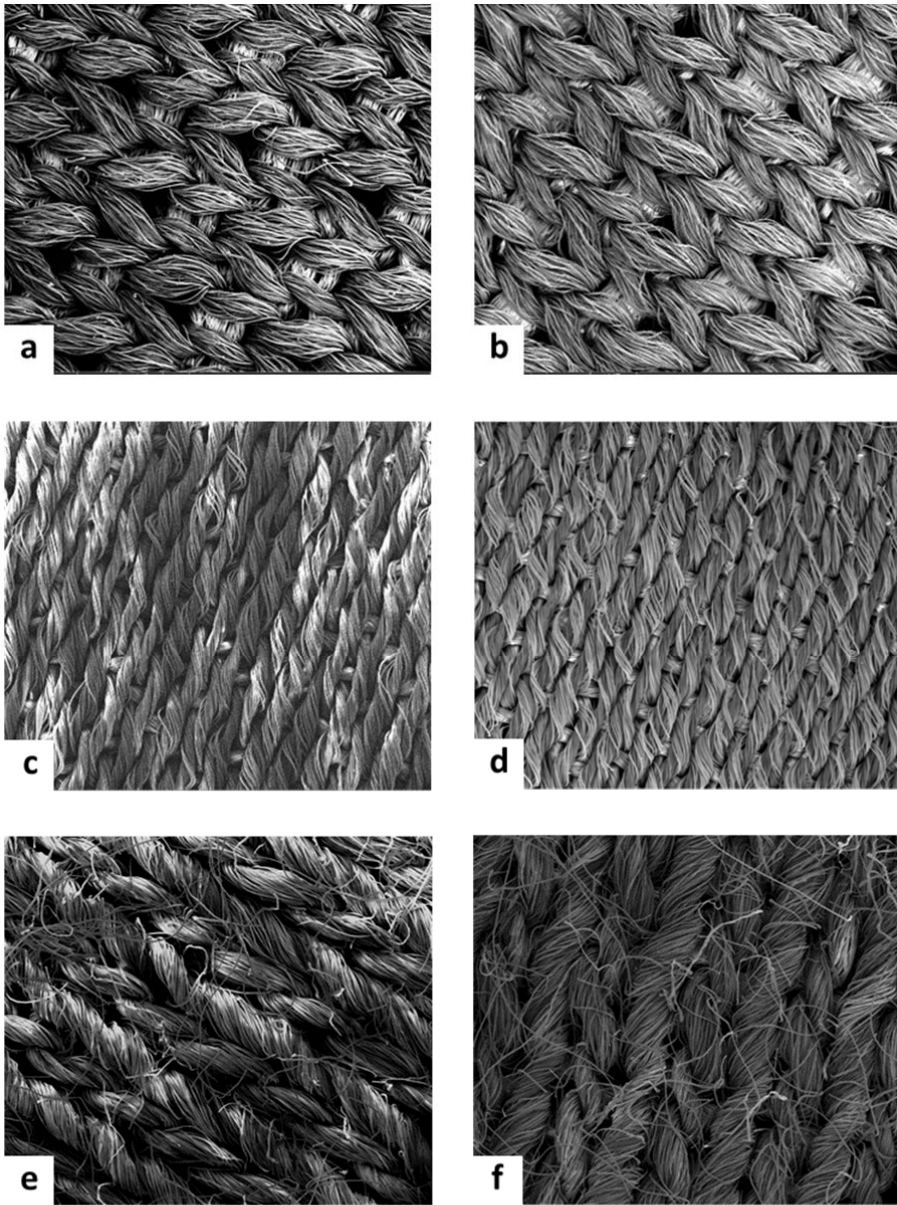

**Figure S3.** SEM micrographs of a) BT before washing test, b) BT after 10 washing cycles, c) GT polyester front part before washing, d) GT polyester front part and after 10 washing cycles, e) GT cotton/modal back part before washing, f) GT cotton/modal back part after 10 washing cycles.

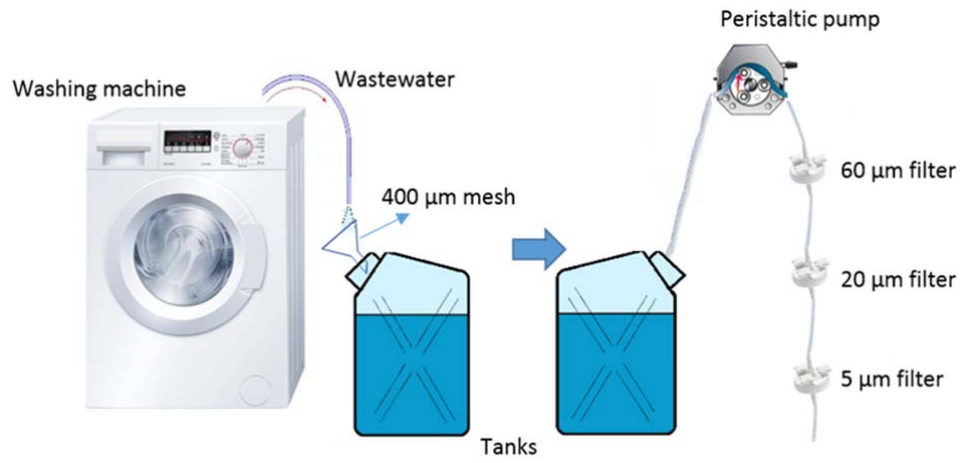

**Figure S4.** Drawing of the filtration system
